# Supplementary material for: Association of Gut Microbiome and Dipeptidyl Peptidase 4 in Immune-Mediated Inflammatory Bowel Disease: A Rapid Literature Review
Source: Preprints.org preprint supplement (doi:10.20944/preprints202410.1079.v1), 2024-10-14
Supplement: Supplementary file 1 [file supplementary]

| **Supplementary Table 2.** Summary of risk of bias of the included studies. Quality assessment of studies was performed with “Animal Research: Reporting of *In Vivo* Experiments” (ARRIVE; Percie du Sert *et al.*, 2020), “STrengthening the Reporting of OBservational studies in Epidemiology” (STROBE: von Elm *et al.*, 2007), and a quality assessment tool for basic science studies (Cosme *et al.*, 2021). Different criteria were scored with low risk of bias (“+”, green) if the desirable information was reported in the study, high risk of bias (“-“, red) if the criterion was not accomplished through the reported information, and unclear risk of bias (“?”, yellow) if the information was not stated or incompletely reported in the study. | | | | | | | | | | | | | | | | | | | | | | | | | | | | | | | | | | | | | | | | | | | |
| --- | --- | --- | --- | --- | --- | --- | --- | --- | --- | --- | --- | --- | --- | --- | --- | --- | --- | --- | --- | --- | --- | --- | --- | --- | --- | --- | --- | --- | --- | --- | --- | --- | --- | --- | --- | --- | --- | --- | --- | --- | --- | --- | --- |
| **Study** | **Risk of bias criteria** | | | | | | | | | | | | | | | | | | | | | | | | | | | | | | | | | | | | | | | | | | |
|  | *“Animal Research: Reporting of In Vivo Experiments” (ARRIVE) guidelines* | | | | | | | | | | | | | | | | | | | | | | | | | | | | | | | | | | | | | | | | | | |
|  | 1 | | | | 2 | | | | 3 | | | | | 4 | | | | 5 | | | | | 6 | | | | 7 | | | | 8 | | | | | 9 | | | | 10 | | | |
| **Hanawa, 2021** |  | | | |  | | | |  | | | | |  | | | |  | | | | |  | | | |  | | | |  | | | | |  | | | |  | | | |
| **Lee, 2019** |  | | | |  | | | |  | | | | |  | | | |  | | | | |  | | | |  | | | |  | | | | |  | | | |  | | | |
| **Olivares, 2018** |  | | | |  | | | |  | | | | |  | | | |  | | | | |  | | | |  | | | |  | | | | |  | | | |  | | | |
| **Peng, 2022** |  | | | |  | | | |  | | | | |  | | | |  | | | | |  | | | |  | | | |  | | | | |  | | | |  | | | |
| **Ye, 2021** |  | | | |  | | | |  | | | | |  | | | |  | | | | |  | | | |  | | | |  | | | | |  | | | |  | | | |
|  | *“STrengthening the Reporting of OBservational studies in Epidemiology” (STROBE) guidelines* | | | | | | | | | | | | | | | | | | | | | | | | | | | | | | | | | | | | | | | | | | |
|  | 1 | 2 | | 3 | | 4 | | 5 | | | 6 | 7 | | | 8 | | 9 | | 10 | | 11 | 12 | | 13 | | 14 | | 15 | | 16 | | | 17 | 18 | | | 19 | | 20 | | 21 | | 22 |
| **Manka, 2021** |  |  | |  | |  | |  | | |  |  | | |  | |  | |  | |  |  | |  | |  | |  | |  | | |  |  | | |  | |  | |  | |  |
|  | *Quality assessment tool for basic science studies* | | | | | | | | | | | | | | | | | | | | | | | | | | | | | | | | | | | | | | | | | | |
|  | 1 | | 2 | | | | 3 | | | 4 | | | 5 | | | 6 | | | | 7 | | | 8 | | 9 | | | | 10 | | | 11 | | | 12 | | | 13 | | | | 14 | |
| **Cuffaro, 2021** |  | |  | | | |  | | |  | | |  | | |  | | | |  | | |  | |  | | | |  | | |  | | |  | | |  | | | |  | |
